# Supplementary material
Source: PubMed Central journal article supplement (PMC3890785)
Supplement: 1316265110_pnas.201316265SI.pdf [file 1316265110_pnas.201316265SI.pdf]

# Supporting Information

Holman et al. 10.1073/pnas.1316265110

**Table S1. GfK KnowledgePanel Demographic Comparisons, February 2013**

| Demographic variable                     | Adult GfK panel members, %* | Adult US population, December 2012 Current Population Survey, % <sup>†</sup> | Holman et al. study sample, weighted, % |
|------------------------------------------|-----------------------------|------------------------------------------------------------------------------|-----------------------------------------|
| Sex                                      |                             |                                                                              |                                         |
| Male                                     | 48.10                       | 48.10                                                                        | 47.60                                   |
| Female                                   | 51.90                       | 51.90                                                                        | 52.40                                   |
| Age                                      |                             |                                                                              |                                         |
| 18–24                                    | 11.80                       | 12.70                                                                        | 11.00                                   |
| 25–34                                    | 17.10                       | 17.50                                                                        | 15.90                                   |
| 35–44                                    | 16.90                       | 16.80                                                                        | 19.10                                   |
| 45–54                                    | 17.40                       | 18.50                                                                        | 18.00                                   |
| 55–64                                    | 18.90                       | 16.40                                                                        | 18.80                                   |
| 65 or over                               | 17.80                       | 18.10                                                                        | 17.20                                   |
| Race                                     |                             |                                                                              |                                         |
| White only                               | 77.60                       | 79.50                                                                        | 78.50                                   |
| Black (African American)                 | 12.40                       | 12.20                                                                        | 12.30                                   |
| American Indian, Alaskan Native          | 0.90                        | 1.00                                                                         | 1.30                                    |
| Asian                                    | 3.30                        | 5.30                                                                         | 4.50                                    |
| Hawaiian or Pacific Islander             | 0.50                        | 0.30                                                                         | 0.70                                    |
| 2+ races                                 | 5.20                        | 1.60                                                                         | 2.70                                    |
| Hispanic ethnicity                       |                             |                                                                              |                                         |
| Hispanic                                 | 14.50                       | 15.00                                                                        | 13.30                                   |
| Non-Hispanic                             | 85.50                       | 85.00                                                                        | 86.70                                   |
| Employment status                        |                             |                                                                              |                                         |
| In the labor force                       | 67.80                       | 65.10                                                                        | 66.60                                   |
| Employed                                 | 57.10                       | 60.20                                                                        | 57.10                                   |
| Unemployed                               | 10.70                       | 4.90                                                                         | 9.50                                    |
| Not in the labor force                   | 32.20                       | 34.90                                                                        | 33.40                                   |
| Marital Status                           |                             |                                                                              |                                         |
| Married                                  | 54.00                       | 53.70                                                                        | 52.30                                   |
| Not married                              | 46.00                       | 46.30                                                                        | 47.70                                   |
| Housing ownership <sup>‡</sup>           |                             |                                                                              |                                         |
| Own                                      | 69.80                       | 68.90                                                                        | 68.90                                   |
| Rent/other                               | 30.20                       | 31.10                                                                        | 31.10                                   |
| Level of education                       |                             |                                                                              |                                         |
| Less than high school diploma            | 12.20                       | 12.60                                                                        | 9.60                                    |
| High school diploma                      | 29.80                       | 30.10                                                                        | 32.20                                   |
| Some college                             | 28.80                       | 28.80                                                                        | 30.80                                   |
| Bachelor's degree or beyond              | 29.20                       | 28.60                                                                        | 27.30                                   |
| Household income <sup>‡</sup>            |                             |                                                                              |                                         |
| Under \$10,000                           | 5.00                        | 5.40                                                                         | 5.40                                    |
| \$10,000–\$24,999                        | 13.00                       | 13.40                                                                        | 13.60                                   |
| \$25,000–\$49,999                        | 23.50                       | 23.40                                                                        | 23.00                                   |
| \$50,000–\$74,999                        | 18.90                       | 18.60                                                                        | 19.60                                   |
| \$75,000 or more                         | 39.50                       | 39.20                                                                        | 38.30                                   |
| Census region                            |                             |                                                                              |                                         |
| Northeast                                | 18.30                       | 18.20                                                                        | 18.30                                   |
| Midwest                                  | 21.80                       | 21.50                                                                        | 22.00                                   |
| South                                    | 36.90                       | 37.00                                                                        | 36.70                                   |
| West                                     | 23.00                       | 23.20                                                                        | 23.00                                   |
| Internet access (household) <sup>§</sup> | 75.20                       | 75.00                                                                        | 75.80                                   |

\*Active profiled adults are weighted to be representative of the US population on age, sex, race, Hispanic ethnicity, language proficiency, region, metro status, education, household income, homeownership, and Internet access using poststratification adjustments to offset any nonresponse or noncoverage bias.

<sup>†</sup>Estimates were calculated using December 2012 Current Population Survey (CPS) microdata available at [www.census.gov](http://www.census.gov). The data are weighted using CPS final individual weights.

<sup>‡</sup>National housing and income statistics are from March 2012 CPS Annual Social and Economic Supplement.

<sup>§</sup>National Internet coverage statistics are from October 2010 CPS Internet and Computer Use Supplement.
